# Supplementary material for: Borrelia burgdorferi BmpA-BBK32 and BmpA-BBA64: New Recombinant Chimeric Proteins with Potential Diagnostic Value
Source: MDPI journal article supplement (doi:10.3390/pathogens10060767), 2021-06-18
Supplement: s1 [file s1]

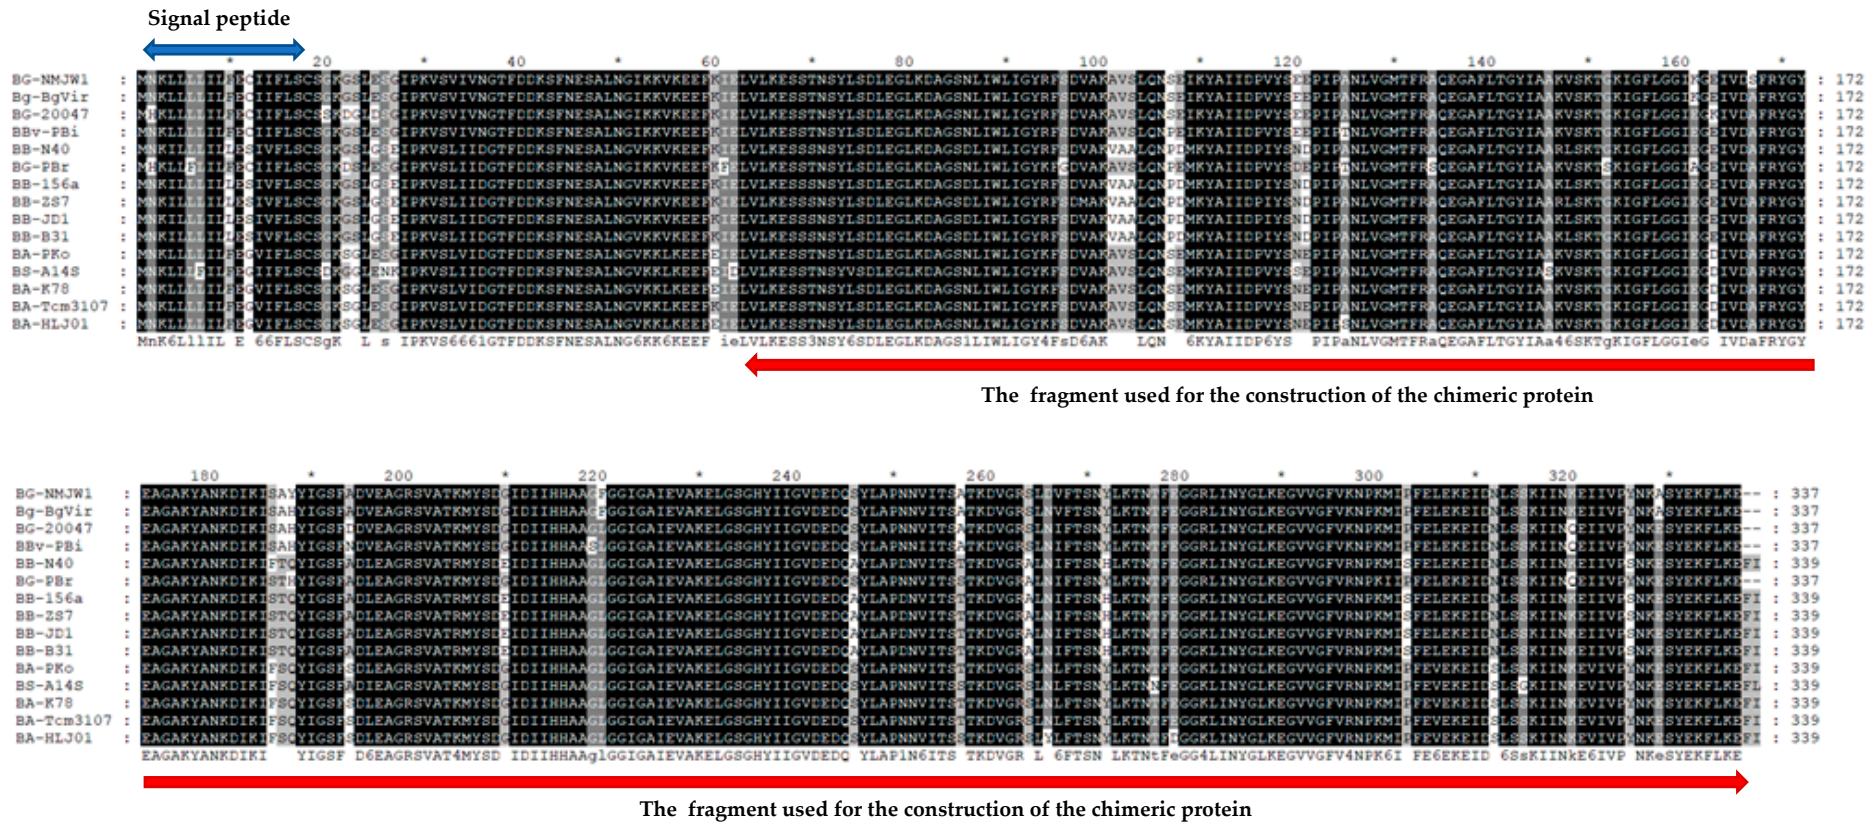

Figure S1. Multiple amino acid sequence alignment of the BmpA protein of *B. burgdorferi* s.l. deposited in NCBI

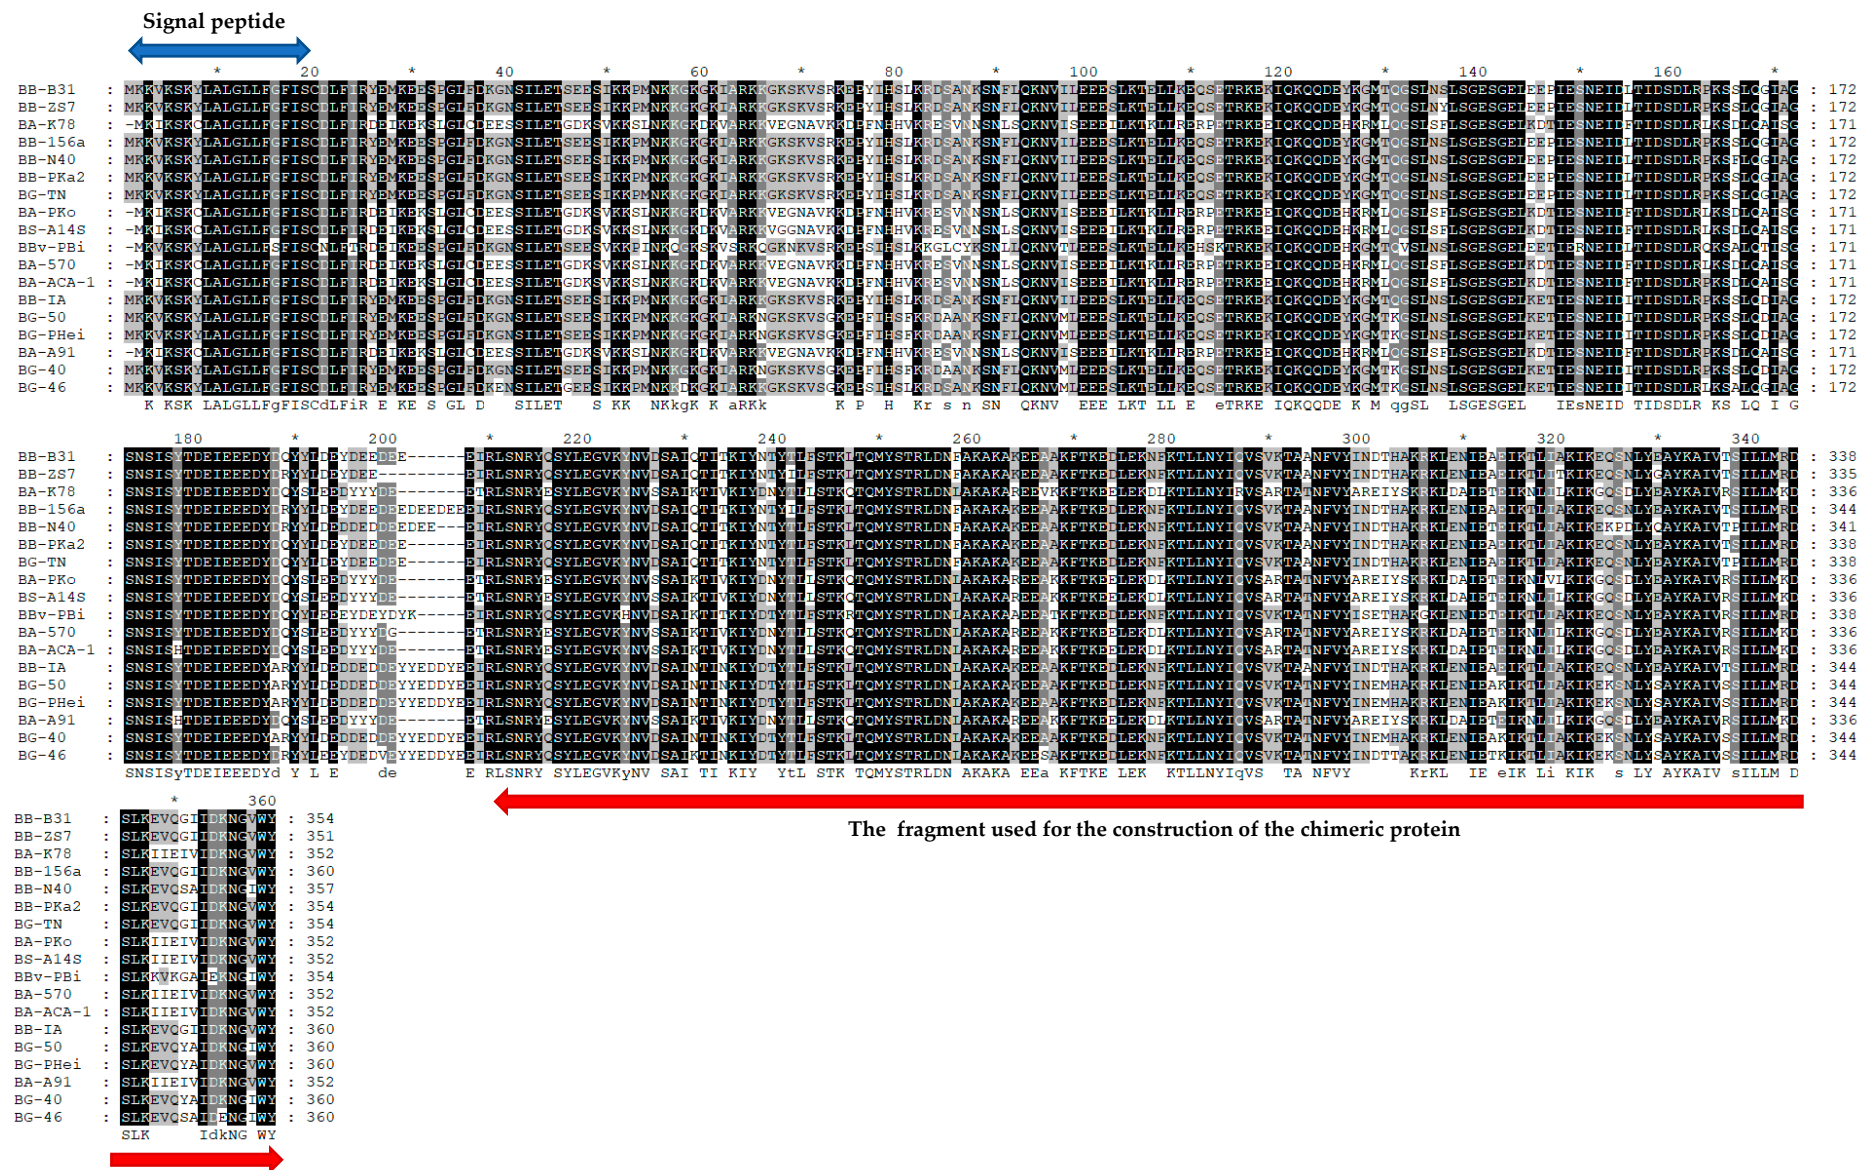

Figure S2. Multiple amino acid sequence alignment of the BBK32 protein of *B. burgdorferi* s.l. deposited in NCBI





**Table S1.** The level of IgG antibodies and reactivity of chimeric proteins with individual sera (bold sera for which the results are shown in Figure 1.)

| BmpA-BBA64     |            |                 |               |              | BmpA-BBK32     |            |                 |               |              |
|----------------|------------|-----------------|---------------|--------------|----------------|------------|-----------------|---------------|--------------|
| Positive sera  |            |                 | Negative sera |              | Positive sera  |            |                 | Negative sera |              |
| No.            | IgG level  | Results         | No.           | Results      | No.            | IgG level  | Results         | No.           | Results      |
| 1              | 35         | Reactive        | 1             | Non reactive | 1              | 35         | Reactive        | 1             | Non reactive |
| 2              | 39         | Reactive        | 2             | Non reactive | 2              | 39         | Reactive        | 2             | Non reactive |
| 3              | 42         | Reactive        | 3             | No reactive  | 3              | 42         | Reactive        | 3             | No reactive  |
| 4              | 48         | Reactive        | 4             | Non reactive | 4              | 48         | Reactive        | 4             | Non reactive |
| 5              | 51         | Reactive        | 5             | Non reactive | 5              | 51         | Reactive        | 5             | Non reactive |
| 6              | 56         | Reactive        | 6             | Non reactive | 6              | 56         | Reactive        | 6             | Non reactive |
| 7              | <b>59</b>  | <b>Reactive</b> | 7             | Non reactive | <b>7</b>       | <b>59</b>  | <b>Reactive</b> | 7             | Non reactive |
| 8              | 65         | Reactive        | 8             | Non reactive | 8              | 65         | Reactive        | 8             | Non reactive |
| 9              | 71         | Reactive        | 9             | Non reactive | 9              | 71         | Reactive        | 9             | Non reactive |
| 10             | 77         | Reactive        | 10            | Non reactive | 10             | 77         | Reactive        | 10            | Non reactive |
| 11             | 80         | Reactive        | 11            | Non reactive | 11             | 80         | Reactive        | 11            | Non reactive |
| 12             | 86         | Reactive        | 12            | Non reactive | 12             | 86         | Reactive        | 12            | Non reactive |
| 13             | 94         | Reactive        | 13            | Non reactive | 13             | 94         | Reactive        | 13            | Non reactive |
| <b>14</b>      | <b>98</b>  | <b>Reactive</b> | 14            | Non reactive | <b>14</b>      | <b>98</b>  | <b>Reactive</b> | 14            | Non reactive |
| 15             | 111        | Reactive        | 15            | Non reactive | 15             | 111        | Reactive        | 15            | Non reactive |
| 16             | 137        | Reactive        | 16            | Non reactive | 16             | 137        | Reactive        | 16            | Non reactive |
| 17             | 149        | Reactive        | 17            | Non reactive | 17             | 149        | Reactive        | 17            | Non reactive |
| 18             | 178        | Reactive        | 18            | Non reactive | 18             | 178        | Reactive        | 18            | Non reactive |
| 19             | 195        | Reactive        | 19            | Non reactive | 19             | 195        | Reactive        | 19            | Non reactive |
| <b>20</b>      | <b>203</b> | <b>Reactive</b> | 20            | Non reactive | <b>20</b>      | <b>203</b> | <b>Reactive</b> | 20            | Non reactive |
| <b>Summary</b> |            | <b>20/20</b>    | <b>0/20</b>   |              | <b>Summary</b> |            | <b>20/20</b>    | <b>0/20</b>   |              |

**Figure S4.** pUET1/BmpA-BBA64 map

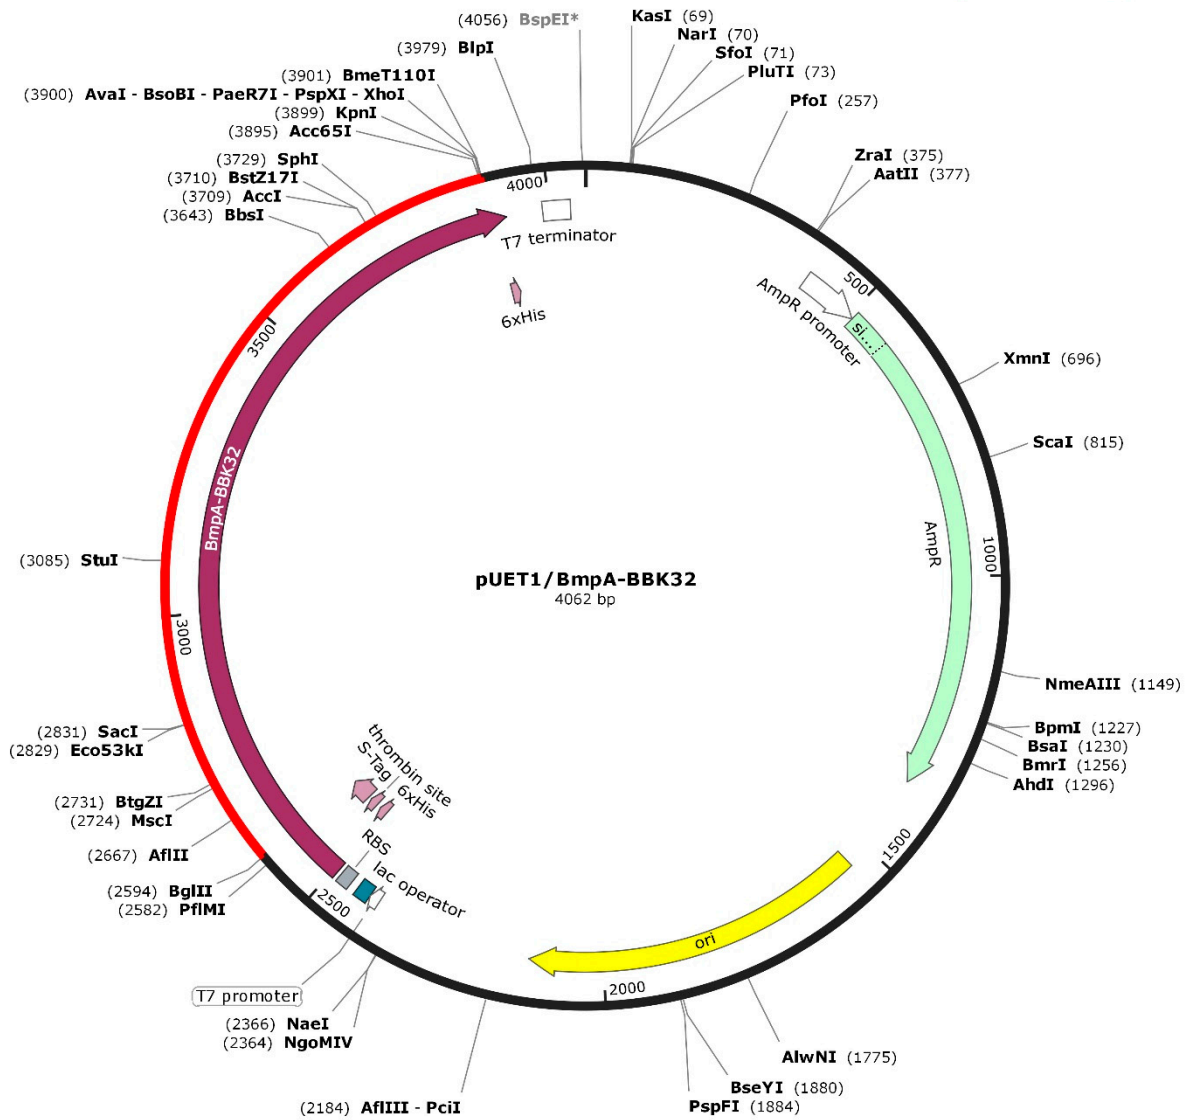

Figure S5. pUET1/BmpA-BBK32 map
